# Supplementary material for: High throughput techniques to reveal the molecular physiology and evolution of digestion in spiders
Source: PubMed Central journal article supplement (PMC5013568; doi:10.1186/s12864-016-3048-9), 2016-09-07

**A**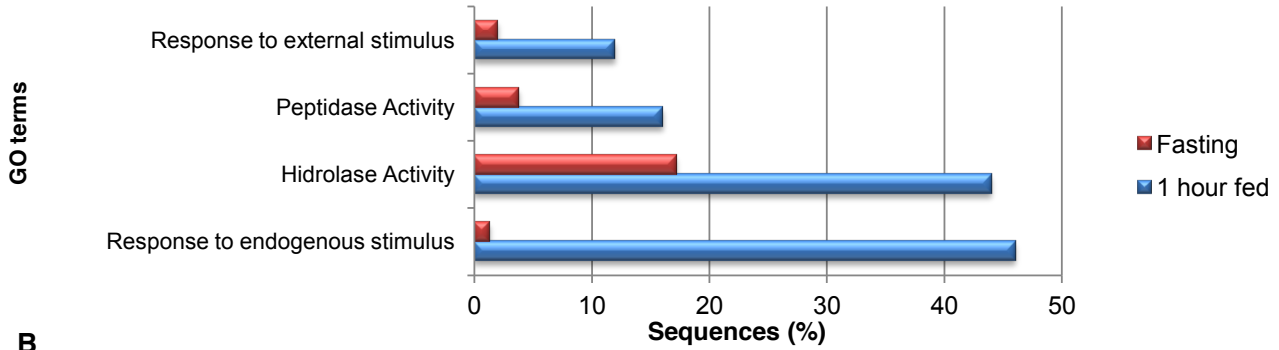**B**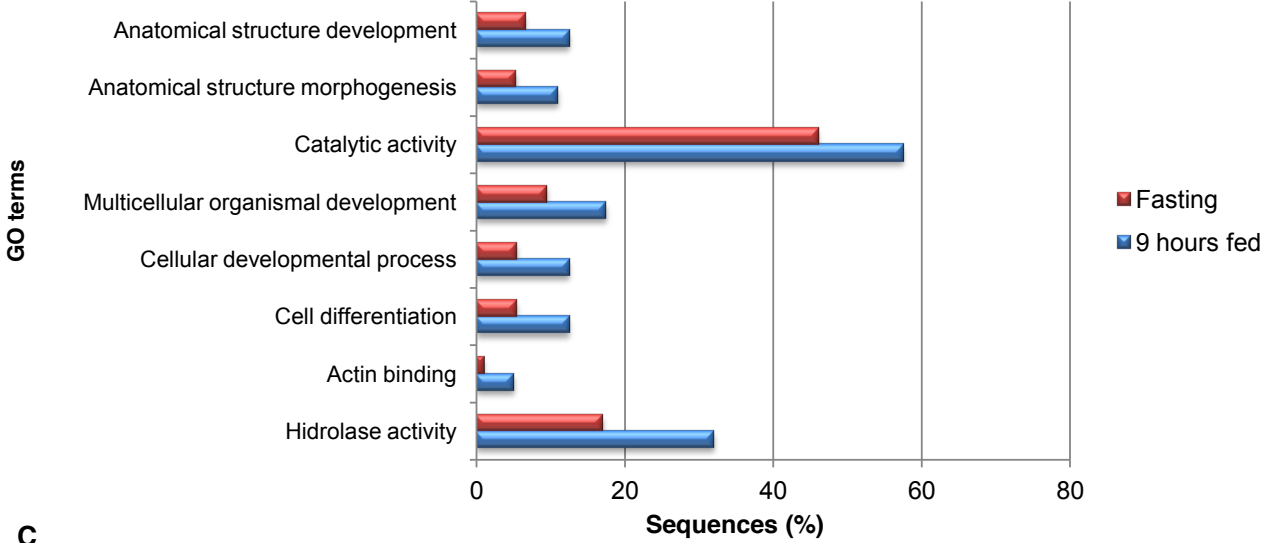**C**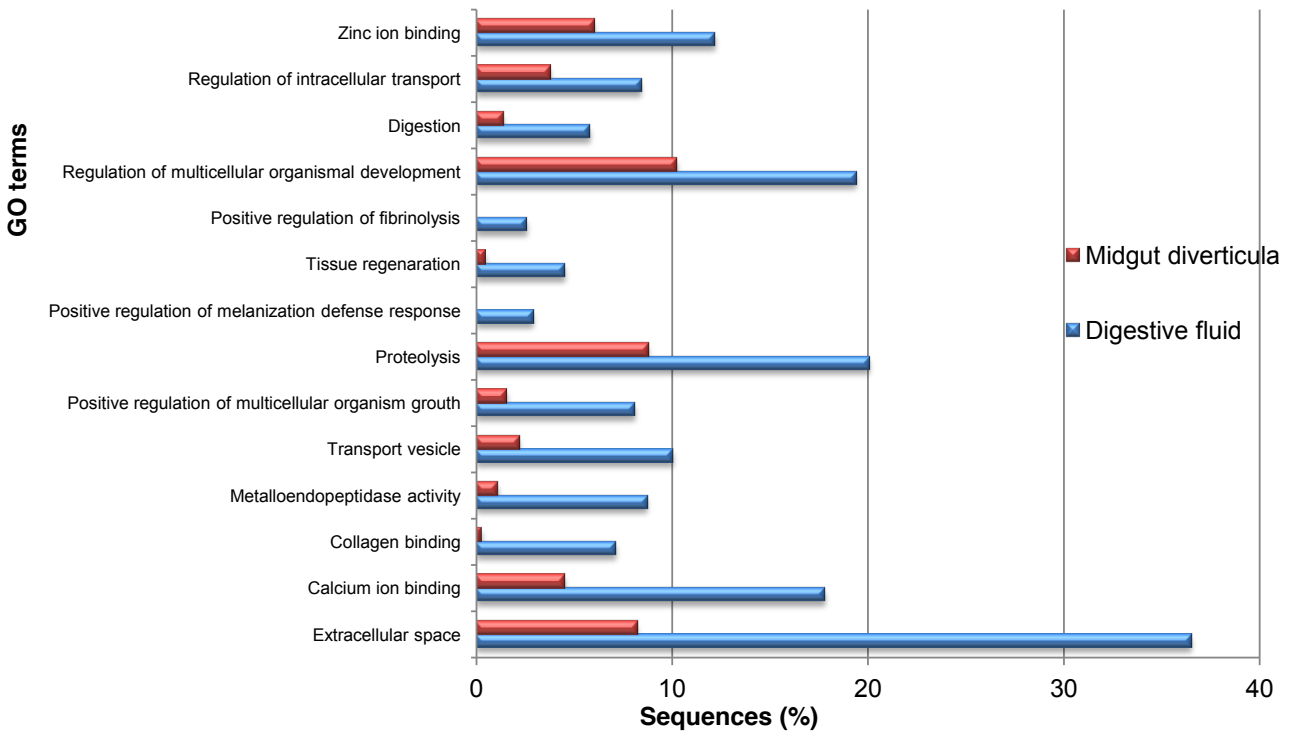

Supplement: 12864_2016_3048_MOESM8_ESM.pdf [file 12864_2016_3048_MOESM8_ESM.pdf]
